# Supplementary material for: Clinical Outcome and 7-Day Virological Clearance in High-Risk Patients with Mild–Moderate COVID-19 Treated with Molnupiravir, Nirmatrelvir/Ritonavir, or Remdesivir
Source: PubMed Central journal article supplement — Infect Dis Ther. 2024 Jun 3;13(7):1589–605. doi: 10.1007/s40121-024-00994-3 (PMC11219607; doi:10.1007/s40121-024-00994-3), 2024-06-03
Supplement: 40121_2024_994_MOESM1_ESM.pdf [file 40121_2024_994_MOESM1_ESM.pdf]

# **CLINICAL OUTCOME AND 7-DAY VIROLOGICAL CLEARANCE IN HIGH-RISK PATIENTS WITH MILD-MODERATE COVID-19 TREATED WITH MOLNUPIRAVIR, NIRMATRELVIR/RITONAVIR OR REMDESIVIR**

Francesca Bai<sup>1\*</sup>, Tomaso Beringheli<sup>1</sup>, Virginia Vitaletti<sup>1</sup>, Andrea Santoro<sup>1</sup>, Francesco Molà<sup>1</sup>, Alessandro Copes<sup>1</sup>, Nicole Gemignani<sup>1</sup>, Sofia Pettenuzzo<sup>1</sup>, Roberto Castoldi<sup>1</sup>, Benedetta Varisco<sup>1</sup>, Riccardo Nardo<sup>1</sup>, Lorenzo Brando Lundgren<sup>1</sup>, Riccardo Ligresti<sup>1</sup>, Matteo Sala<sup>1</sup>, Lorenzo Albertini<sup>1</sup>, Matteo Augello<sup>1</sup>, Lorenzo Biasioli<sup>1</sup>, Valeria Bono<sup>1</sup>, Roberta Rovito<sup>1</sup>, Teresa Bini<sup>1</sup>, Sabrina Passarella<sup>2</sup>, Nicola Vincenzo Orfeo<sup>2</sup>, Antonella d'Arminio Monforte<sup>1</sup>, Giulia Marchetti<sup>1</sup>

<sup>1</sup>Clinic of Infectious Diseases, San Paolo Hospital, ASST Santi Paolo e Carlo, Department of Health Sciences, University of Milano, Milan, Italy

<sup>2</sup> Strategic Hospital Management, ASST Santi Paolo e Carlo, Milan, Italy

\*Corresponding author:

Francesca Bai, MD, PhD

Department of Health Sciences, University of Milan, Clinic of Infectious Diseases, San Paolo Hospital, ASST Santi Paolo e Carlo, Milan, Italy

Address: Via A. Di Rudinì, 8 - 20142 Milan, Italy

E-mail: francesca.bai@asst-santipaolocarlo.it

Phone: +39 0281843046 - Fax: +39 0281843054

## **Prior Presentation**

Preliminary results were presented at the HIV Drug Therapy Glasgow Conference, 23<sup>rd</sup>-26<sup>th</sup> October, 2022.

**Supplementary Table 1 Factors associated with virological clearance at T7 (negative antigenic or RNA nasopharyngeal swab at day 7 after beginning of antiviral treatment) in outpatients by fitting a logistic regression analysis**

| Parameters                                                                   | OR                  | 95% CI                                 | p values                                                 | AOR                 | 95% CI                         | p values                                                 |
|------------------------------------------------------------------------------|---------------------|----------------------------------------|----------------------------------------------------------|---------------------|--------------------------------|----------------------------------------------------------|
| Age,<br>Each year more                                                       | 0.975               | 0.956-<br>0.993                        | <b>0.008</b>                                             | 0.983               | 0.962-1.004                    | 0.105                                                    |
| Sex:<br>Female<br>Male                                                       | 1<br>0.802          | <br>0.449-<br>1.433                    | <br>0.456                                                |                     |                                |                                                          |
| Vaccination:<br>>120 days<br>≤120 days                                       | 1<br>0.566          | <br>0.298-<br>1.075                    | <br>0.082                                                |                     |                                |                                                          |
| Immunodeficiency:<br>Yes<br>No                                               | 1<br>0.782          | <br>0.357-<br>1.710                    | <br>0.537                                                | 1<br>1.464          | <br>0.597-3.591                | <br>0.405                                                |
| Days from symptoms<br>onset to treatment,<br>Each day more                   | 1.035               | 0.869-<br>1.234                        | 0.698                                                    |                     |                                |                                                          |
| Antiviral treatment:<br>Nirmatrelvir/Ritonavir<br>Remdesivir<br>Molnupiravir | 1<br>0.335<br>0.181 | <br>0.162-<br>0.690<br>0.084-<br>0.390 | <br><b>&lt;0.001</b><br><b>0.003</b><br><b>&lt;0.001</b> | 1<br>0.356<br>0.196 | <br>0.167-0.758<br>0.088-0.439 | <br><b>&lt;0.001</b><br><b>0.007</b><br><b>&lt;0.001</b> |

**LEGEND** OR, odds ratio; AOR, adjusted odds ratio; 95%CI, 95% confidence interval. Multivariable logistic regression model is adjusted for age and immunodeficiency.
